# Supplementary material
Source: MDPI journal article supplement (https://www.mdpi.com/2313-0105/8/6/56)
Supplement: s1 [file s1]

## Supporting information

### Metal Substitution *versus* Oxygen-Storage Treatment to Regulate the Oxygen Redox Reactions at Sodium-deficient Three-Layered Oxides

M. Kalapsazova, R. Kukeva, E. Zhecheva, R. Stoyanova\*

*Institute of General and Inorganic Chemistry, Bulgarian Academy of Sciences, Sofia*

*1113, Bulgaria*

Institute of General and Inorganic Chemistry, Bulgarian Academy of Sciences, 1113 Sofia,

Bulgaria

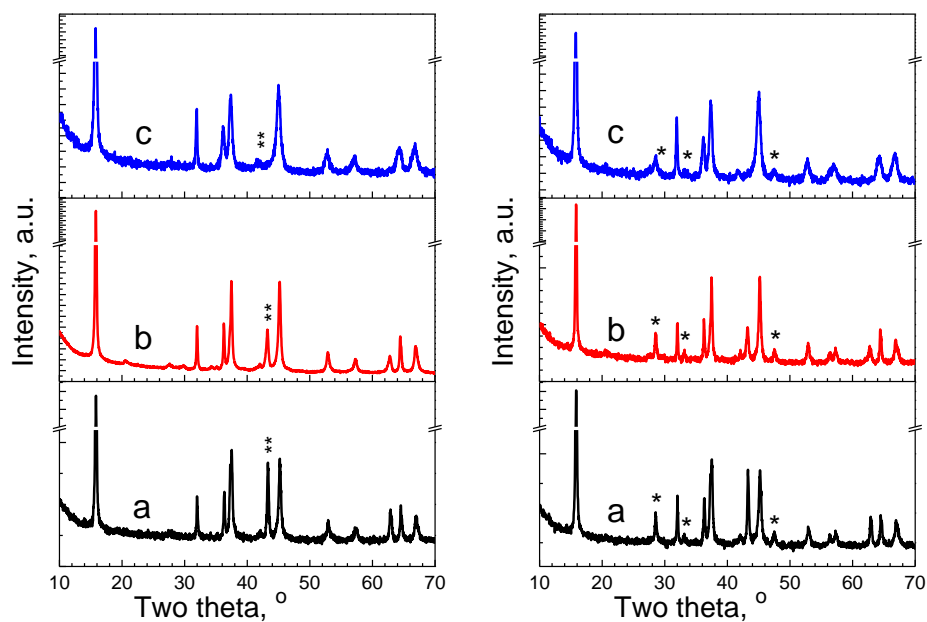

**Figure S1.** XRD patterns of NNM, NM16, NT16 (left) and their CeO<sub>2</sub>-treated analogues (right). The symbol \* indicates the most intensive diffraction peaks due to CeO<sub>2</sub>, while \*\* - corresponds to impurity NiO.

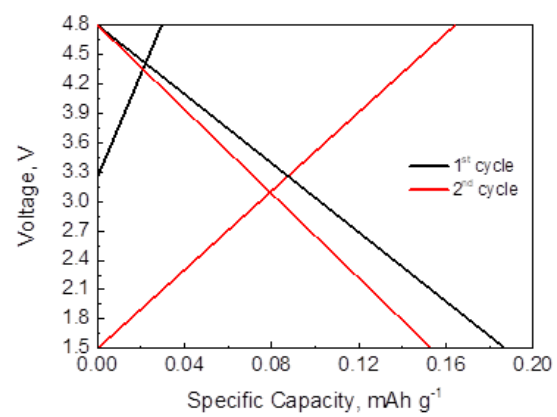

**Figure S2.** Charge-discharge curves of  $\text{CeO}_2$  in sodium-ion cell.
